# Supplementary material for: Gene-Lifestyle Interaction and Type 2 Diabetes: The EPIC InterAct Case-Cohort Study
Source: PLoS Med. 2014 May 20;11(5):e1001647. doi: 10.1371/journal.pmed.1001647 (PMC4028183; doi:10.1371/journal.pmed.1001647)
Supplement: Table S11 — Baseline characteristics by quartiles of genetic risk score (imputed, unweighted) in the InterAct sub-cohort. (XLSX) [file pmed.1001647.s012.xlsx]

## Sheet: Sheet1
Table ST11: Baseline characteristics by quartiles of genetic risk score (imputed, unweighted) in the InterAct sub-cohort.
	Q1			Q2			Q3			Q4
	N=2425			N=2656			N=2914			N=3138
	% missing	Mean / %	SD / N	% missing	Mean / %	SD / N	% missing	Mean / %	SD / N	% missing	Mean / %	SD / N
Age (yrs)	0	52.0928	9.47047	0	51.5599	9.61502	0	51.5132	9.69439	0	51.7948	9.72678
Weight (kg)	0.783505	71.9749	13.5297	0.527108	71.3535	13.2239	0.411805	71.4296	13.1029	0.764818	71.203	13.2385
Height (cm)	0.453608	166.286	9.45478	0.301205	165.919	9.03022	0.308854	165.648	9.10591	0.446144	165.362	9.13853
BMI (kg/m2)	0.865979	26.0012	4.36594	0.564759	25.899	4.26335	0.549073	26.016	4.26413	0.860421	26.0002	4.17351
Waist (cm)	0.597	85.9592	12.9907	0.785	85.7811	13.0425	0.635	85.8106	12.4737	0.612	85.7475	12.4061
Waist hip ratio (%)	0.597	0.846075	0.0927546	0.992	0.84538	0.0942496	0.71	0.844074	0.0900027	0.714	0.844885	0.0910451
Weight at age 20 years (kg)	14.968	61.7341	10.8011	12.52	61.3534	10.3171	14.34	60.3895	10.1365	15.34	60.8342	10.2435
Average annual weight change (kg)	14.97	0.291097	0.329599	12.52	0.298804	0.3229	14.43	0.31326	0.316102	15.52	0.324867	0.697216
Sex	0			0			0			0
Men		37.8557	918		35.7304	949		35.175	1025		34.4487	1081
Women		62.1443	1507		64.2696	1707		64.825	1889		65.5513	2057
Alcohol drinker at baseline	0			0			0			0
No		17.0722	414		16.5286	439		17.0556	497		20.0128	628
Yes		82.9278	2011		83.4714	2217		82.9444	2417		79.9873	2510
Physical activity	1.69072			1.73193			1.78449			1.52964
Inactive		24.9485	605		23.5693	626		25.2231	735		25.5577	802
Mod. inactive		34.268	831		33.8102	898		31.8463	928		34.2894	1076
Mod. active		22.8454	554		22.7786	605		22.2375	648		21.4149	672
Active		16.2474	394		18.1099	481		18.9087	551		17.2084	540
Highest school level	1.15464			1.09187			1.33837			1.3703
None		7.71134	187		7.53012	200		8.71654	254		8.47674	266
Primary		30.8866	749		32.4548	862		32.1551	937		32.6004	1023
Technical		21.4433	520		22.2892	592		21.0364	613		21.9885	690
Secondary		16.3299	396		15.6626	416		14.9622	436		15.2964	480
Further education		21.567	523		19.9172	529		21.1736	617		19.4391	610
Smoking status	1.56701			1.05422			1.6129			1.30656
Never		48.2474	1170		46.4985	1235		48.5244	1414		48.1836	1512
Former		25.732	624		26.2425	697		26.1839	763		26.4181	829
Current		24.4536	593		26.2048	696		23.6788	690		24.0918	756
Mediterranean diet score	2.18557			1.73193			2.53946			2.35819
0-6		26.5979	645		26.2425	697		23.7474	692		23.6456	742
7-10		43.6289	1058		43.7124	1161		43.3082	1262		42.7661	1342
11-18		27.5876	669		28.3133	752		30.4049	886		31.2301	980
Family history of diabetes	9.76505			12.1884			10.8371			10.3832
No		75.0367	1022		71.2604	1029		70.0195	1079		70.3337	1138
Yes		15.1982	207		16.5512	239		19.1434	295		19.2831	312
Family history of diabetes was not ascertained in Italy, Spain, Heidelberg and Oxford (excluded from these summaries): 1063/1212/1373/1520.
Waist and waist hip ratio were not measured in Umea (excluded from these summaries): 249/236/237/198.
Weight at age 20 years was not ascertained in France, Spain, Florence, Ragusa, Turin, Netherlands, Heidelberg, Umea (excluded from these summaries): 1483/1650/1847/1991.
Data from Denmark (N=2129) are excluded from this table.
